# Supplementary material for: Capture and characterization of elusive cyclo-di-BADGE
Source: Royal Society of Chemistry journal article supplement (doi:10.1039/d3nj03542e), 2023-01-01

*Electronic Supplementary Information for*

## **Capture and characterization of elusive cyclo-di-BADGE**

Fatemeh Salami,<sup>a</sup> Jian-bin Lin,<sup>b</sup> Bing Chen,<sup>c</sup> Baiyu H. Zhang<sup>d</sup> and Yuming Zhao<sup>a\*</sup>

<sup>a</sup>Department of Chemistry, Memorial University, Core Science Facility, 45 Arctic Avenue,  
St. John's, NL, Canada A1C 5S7

<sup>b</sup>Centre for Chemical Analysis, Research and Training (C-CART), Core Science Facility, 45  
Arctic Avenue, St. John's, NL, Canada A1C 5S7

<sup>c</sup>Northern Region Persistent Organic Pollutant Control (NRPOP) Laboratory, Faculty of  
Engineering and Applied Science, Memorial University, St. John's, NL Canada A1B 3X5

### **Table of Contents**

|                                                                                |             |
|--------------------------------------------------------------------------------|-------------|
| <b>1. Crystallization and Purification Procedures for Cyclo-di-BADGE</b>       | <b>S-2</b>  |
| <b>2. Characterizations of Cyclo-di-BADGE</b>                                  | <b>S-3</b>  |
| <b>3. Experimental Procedures for the Titration of BSA with Cyclo-di-BADGE</b> | <b>S-5</b>  |
| <b>4. Conformational Analysis of Cyclo-di-BADGE by CREST/DFT Modeling</b>      | <b>S-6</b>  |
| <b>5. Results of Molecular Docking Studies</b>                                 | <b>S-11</b> |

## 1. Crystallization and Purification Procedures for Cyclo-di-BADGE

### 1.1 Crystallization of cyclo-di-BADGE

Single crystals of cyclo-di-BADGE were obtained during the purification step of the following synthetic reaction. First, a condensation reaction was performed as described in Scheme S-1. After 4 hours of reaction at 110 °C, the reaction mixture was cooled down to room temperature and then worked up through flash silica column chromatography using ethyl acetate and hexanes (9:1, v/v) as the eluent. It was at this stage where the cyclo-di-BADGE was introduced into the system.

The crude products were found to contain a variety of polar PHAs, mostly unreacted starting materials (**1–3**) and the condensation product (**4**) as outlined in Scheme S-1. In an attempt to crystallize the major product(s) from THF/methylene chloride (2:1, v/v), a few pieces of colorless single crystals were picked up, which was later proven to be cyclo-di-BADGE by X-ray analysis.

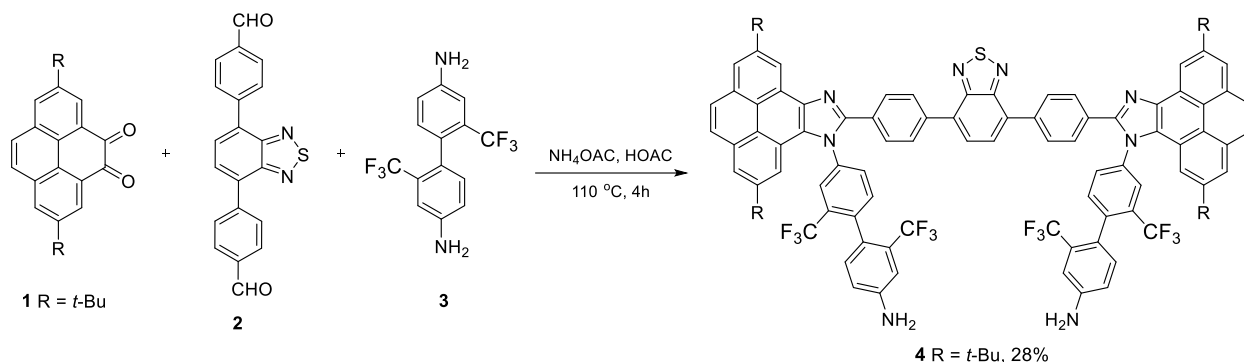

**Scheme S-1** A condensation reaction to produce pyrenoimidazole derivative **4** using pyrenedione as one of the precursors.

### 1.2 Purification of cyclo-di-BADGE

Bulk ethyl acetate (1.5 L) that was contaminated with cyclo-di-BADGE was evaporated by distillation. The resulting crude cyclo-di-BADGE was an oily residue, which was dissolved in dichloromethane (10 mL). To this solution was added hexanes (100 mL) as an anti-solvent. Colorless precipitates were formed and collected through vacuum filtration. The obtained solid sample was further purified through rinsing with diethyl ether (15 mL × 3) at room temperature to remove aliphatic impurities. After this treatment, pure cyclo-di-BADGE (~100 mg) was obtained as colorless powder.

## 2. Characterizations of Cyclo-di-BADGE

### 2.1 FT-IR analysis of cyclo-di-BADGE

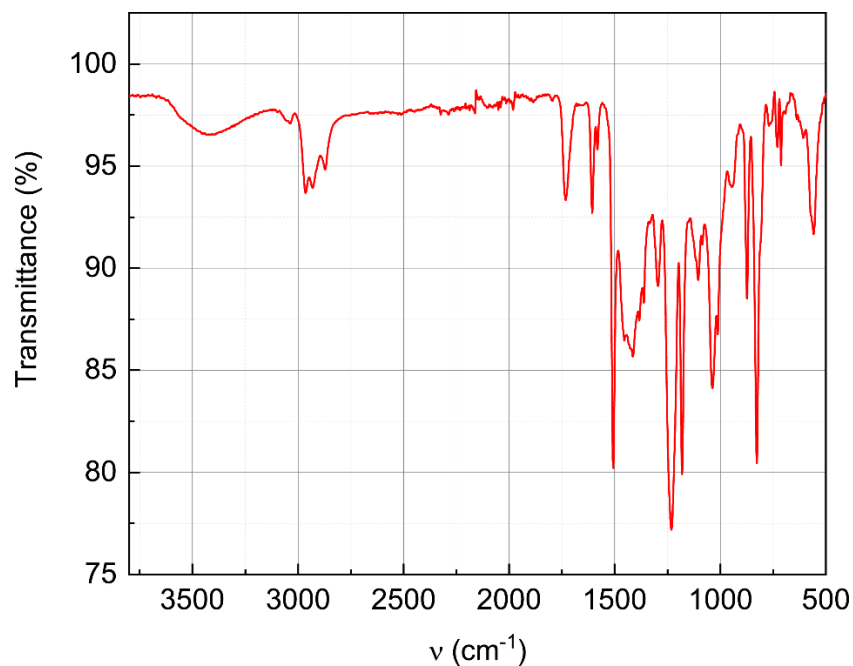

Fig. S-1 FT-IR spectrum of cyclo-di-BADGE.

### 2.2 NMR Spectroscopic analysis of cyclo-di-BADGE

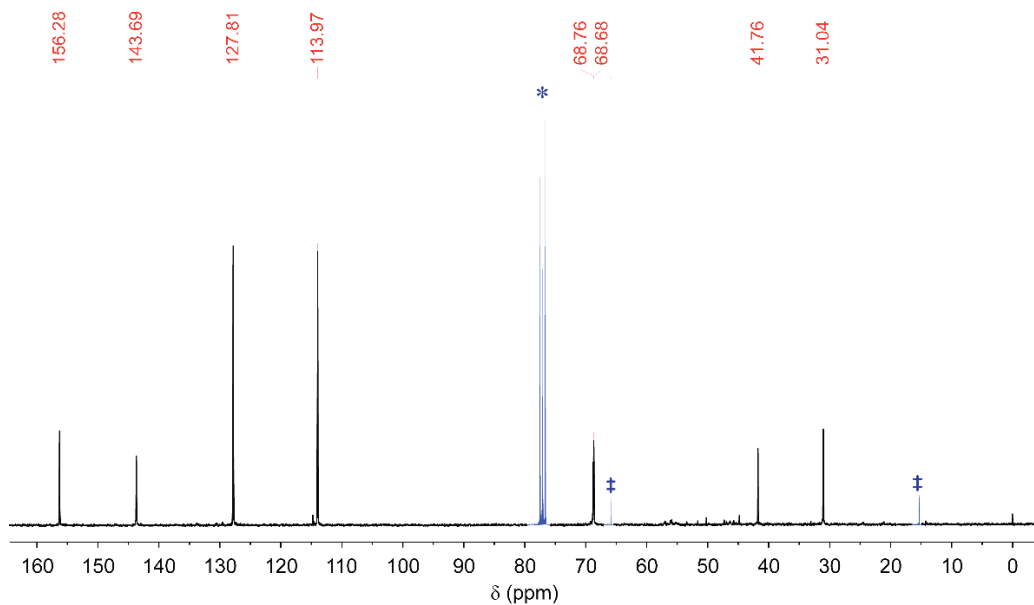

Fig. S-2 <sup>13</sup>C NMR (75 MHz, CDCl<sub>3</sub>) of cyclo-di-BADGE. Solvent signals are indicated (\*CDCl<sub>3</sub>, and ‡diethyl ether).

### 2.3 UV-Vis analysis of cyclo-di-BADGE

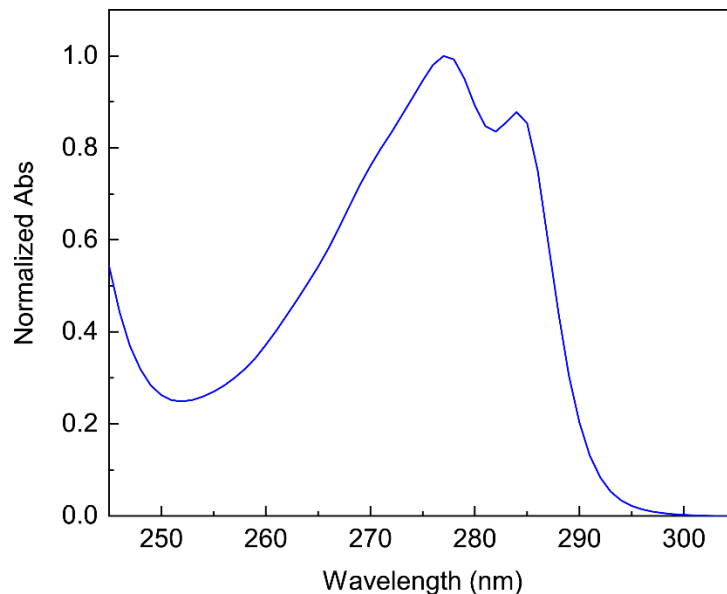

**Fig. S-3** Normalized UV-Vis absorption spectrum of cyclo-di-BADGE measured in DMSO.

### 2.4 X-ray single crystallographic data for cyclo-di-BADGE

**Table S-1.** Crystal data and structure refinement

|                                       |                                                |
|---------------------------------------|------------------------------------------------|
| Identification code                   | cyclo-di-BADGE                                 |
| Empirical formula                     | C <sub>36</sub> H <sub>40</sub> O <sub>6</sub> |
| Formula weight                        | 568.68                                         |
| Temperature/K                         | 100(2)                                         |
| Crystal system                        | monoclinic                                     |
| Space group                           | <i>P</i> 2 <sub>1</sub> / <i>c</i>             |
| <i>a</i> /Å                           | 12.5112(2)                                     |
| <i>b</i> /Å                           | 24.0500(3)                                     |
| <i>c</i> /Å                           | 11.0199(2)                                     |
| $\alpha$ /°                           | 90                                             |
| $\beta$ /°                            | 101.0650(10)                                   |
| $\gamma$ /°                           | 90                                             |
| Volume/Å <sup>3</sup>                 | 3254.18(9)                                     |
| <i>Z</i>                              | 4                                              |
| $\rho_{\text{calc}}$ /cm <sup>3</sup> | 1.161                                          |
| $\mu$ /mm <sup>-1</sup>               | 0.625                                          |
| <i>F</i> (000)                        | 1216.0                                         |
| Crystal size/mm <sup>3</sup>          | 0.094 × 0.086 × 0.058                          |
| Radiation                             | Cu <i>K</i> α ( $\lambda$ = 1.54184)           |

|                                                 |                                                                    |
|-------------------------------------------------|--------------------------------------------------------------------|
| $2\theta$ range for data collection/ $^{\circ}$ | 7.352 to 158.698                                                   |
| Index ranges                                    | $-15 \leq h \leq 15$ , $-24 \leq k \leq 30$ , $-13 \leq l \leq 14$ |
| Reflections collected                           | 33581                                                              |
| Independent reflections                         | 6895 [ $R_{\text{int}} = 0.0454$ , $R_{\text{sigma}} = 0.0344$ ]   |
| Data/restraints/parameters                      | 6895/0/452                                                         |
| Goodness-of-fit on $F^2$                        | 1.091                                                              |
| Final $R$ indexes [ $I \geq 2\sigma(I)$ ]       | $R_1 = 0.0700$ , $wR_2 = 0.1675$                                   |
| Final $R$ indexes [all data]                    | $R_1 = 0.0802$ , $wR_2 = 0.1734$                                   |
| Largest diff. peak/hole / $e \text{ \AA}^{-3}$  | 0.34/-0.30                                                         |

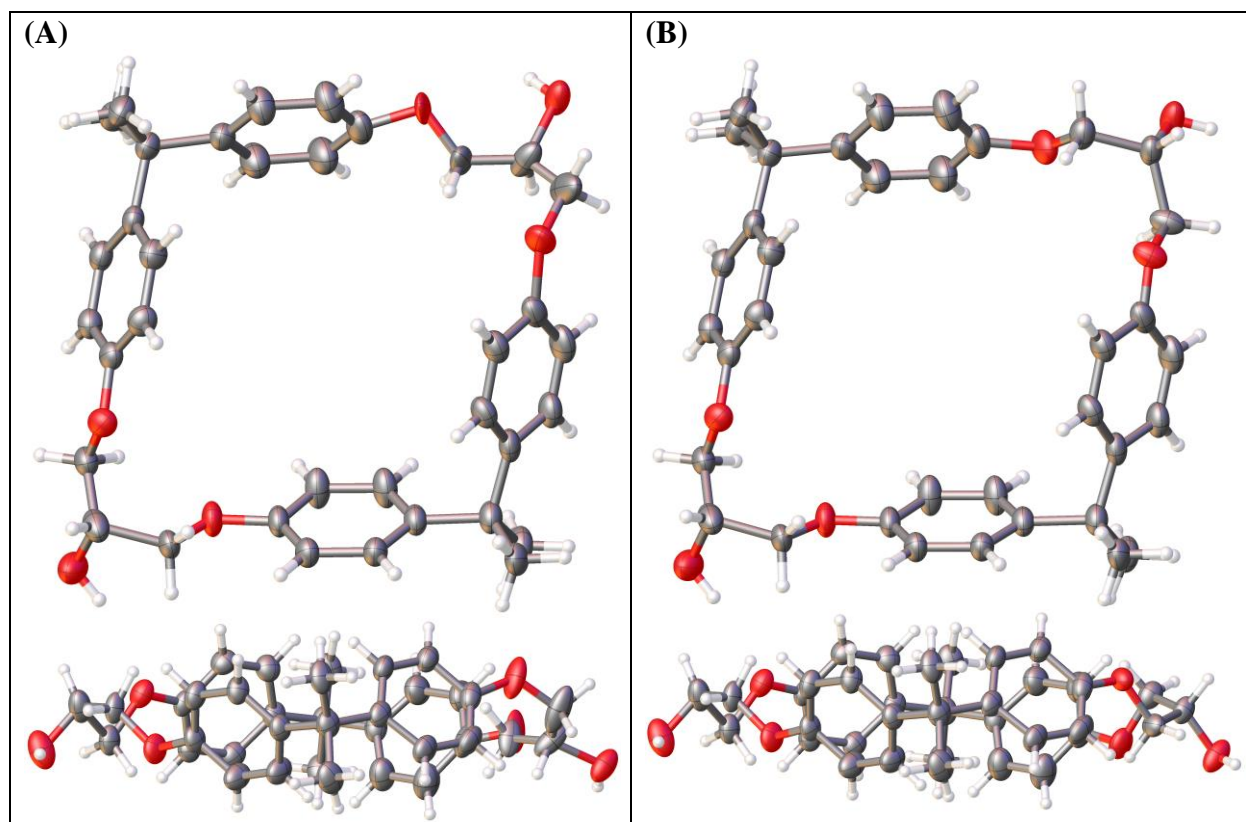

**Fig. S-4** Front and side views of two molecular structures of cyclo-di-BADGE determined in the crystal structure. (A) a *trans* isomer accounting for 3.72% of population. (B) a *cis* isomer account for 11.0% of population.

### 3. Experimental Procedures for the Titration of BSA with Cyclo-di-BADGE

Bovine serum albumin (BSA, pH 7, > 98%) was acquired from Sigma Aldrich. A phosphate-buffered saline (PBS) solution (pH 7.4) was prepared by dissolving NaCl (0.137 M), Na<sub>2</sub>HPO<sub>4</sub> (0.01 M), KCl (0.0027 M), and KH<sub>2</sub>PO<sub>4</sub> (0.0018 M) in millipore purified water. To the PBS buffer solution was added with BSA (49.68 μM), and the resulting BSA solution was titrated with cyclo-di-BADGE. The steps of titration were monitored by UV-Vis (see Fig. S-4) and fluorescence spectral analyses (see Fig. 14 in the main context), respectively.

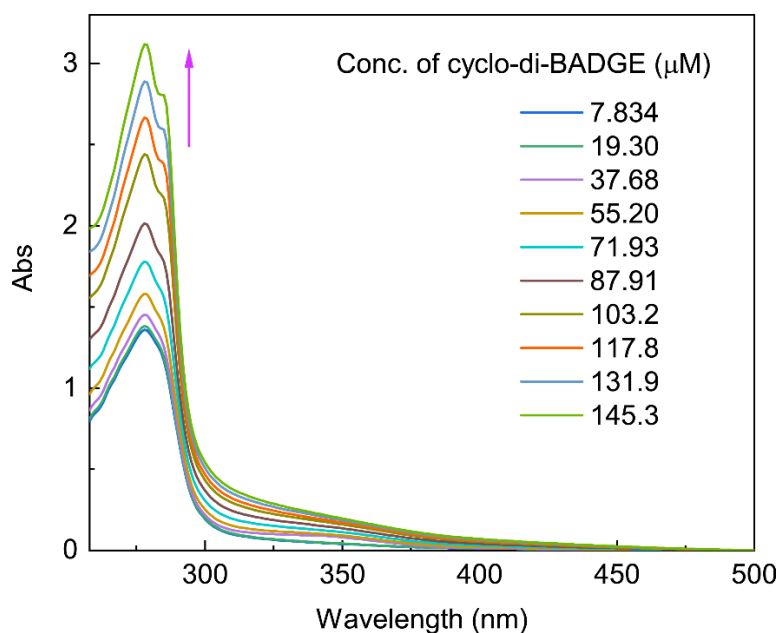

**Fig. S-5** UV-Vis titration of BSA (49.68 mM) with cyclo-di-BADGE in a PBS solution at room temperature.

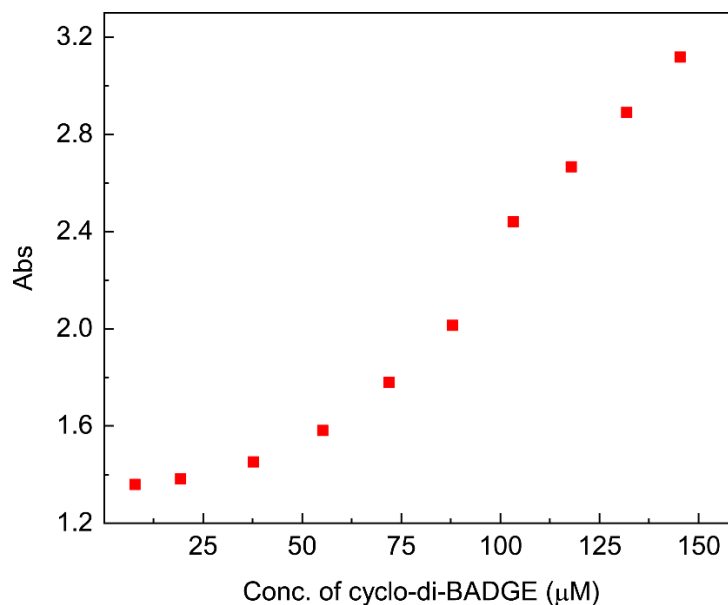

**Fig. S-6** Plot of absorbance at 278 nm with the concentration of cyclo-di-BADGE from the titration of BSA (49.68 mM) with cyclo-di-BADGE in a PBS solution at room temperature. The correlation shows deviation from linearity, which is indicative of the binding of BSA with cyclo-di-BADGE.

#### 4. Conformational Analysis of Cyclo-di-BADGE by CREST/DFT Modeling

The molecular structure of *cis* and *trans* cyclo-di-BADGE were first optimized using the GFN2-xTB program. The optimized structures were next subjected to CREST conformational analysis. A total of 973 conformers were obtained from the CREST calculations on *cis* cyclo-di-BADGE. The interatomic distance between the two dimethyl-substituted carbons in each of the structures is defined as the diagonal distance ( $D$ ). The  $D$  values of all the conformers were extracted using a function integrated in the program, Multiwfn 3.7 (Lu, T.; Chen, F. *J. Comput. Chem.* **2012**, *33*, 580-592).

Fig. S-7 shows a statistical analysis of the  $D$  of these conformers in correlation with their relative energies (rel.  $E$ ). In this plot, the open-shaped conformers with the  $D$  values greater than 10.1 Å are highlighted, which represent structures resembling those determined in the X-ray analysis. Similarly, the structural analysis of the *trans* cyclo-di-BADGE conformers calculated by CREST is summarized in Fig. S-8. Comparison of Fig. S-7 and Fig. S-8 indicates that *trans* cyclo-di-BADGE affords a larger number of open-shaped conformers than *cis* cyclo-di-BADGE.

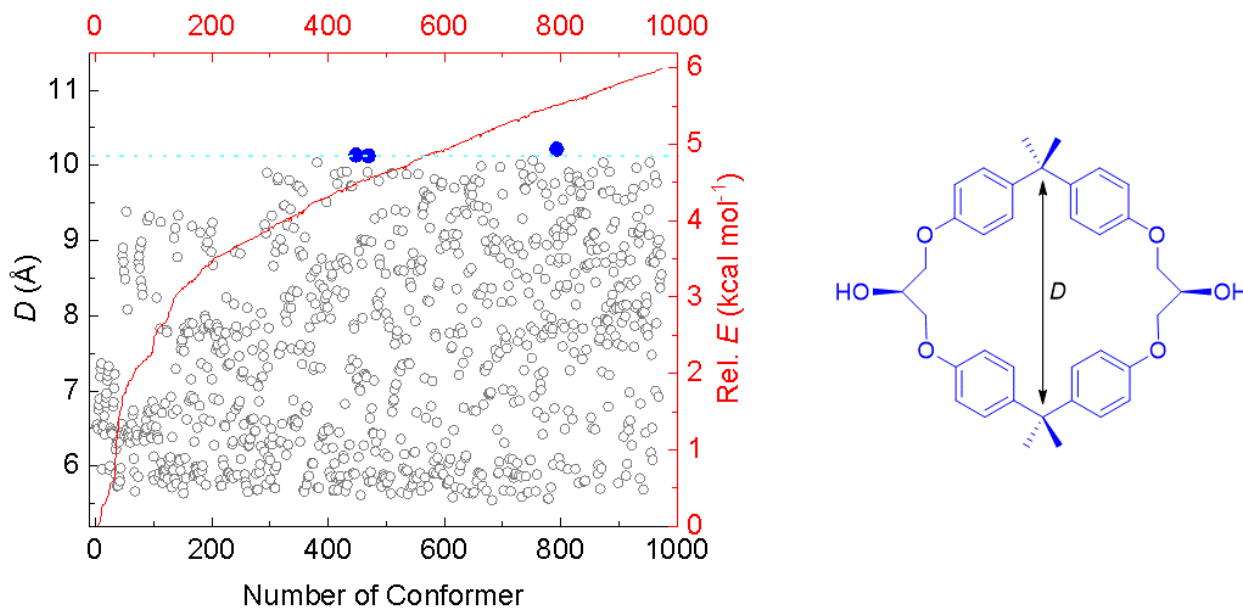

**Fig. S-7** Statistical analysis of the correlations of diagonal distances ( $D$ ) of *cis* cyclo-di-BADGE conformers with their relative energies (rel.  $E$ ) based on CREST calculations.

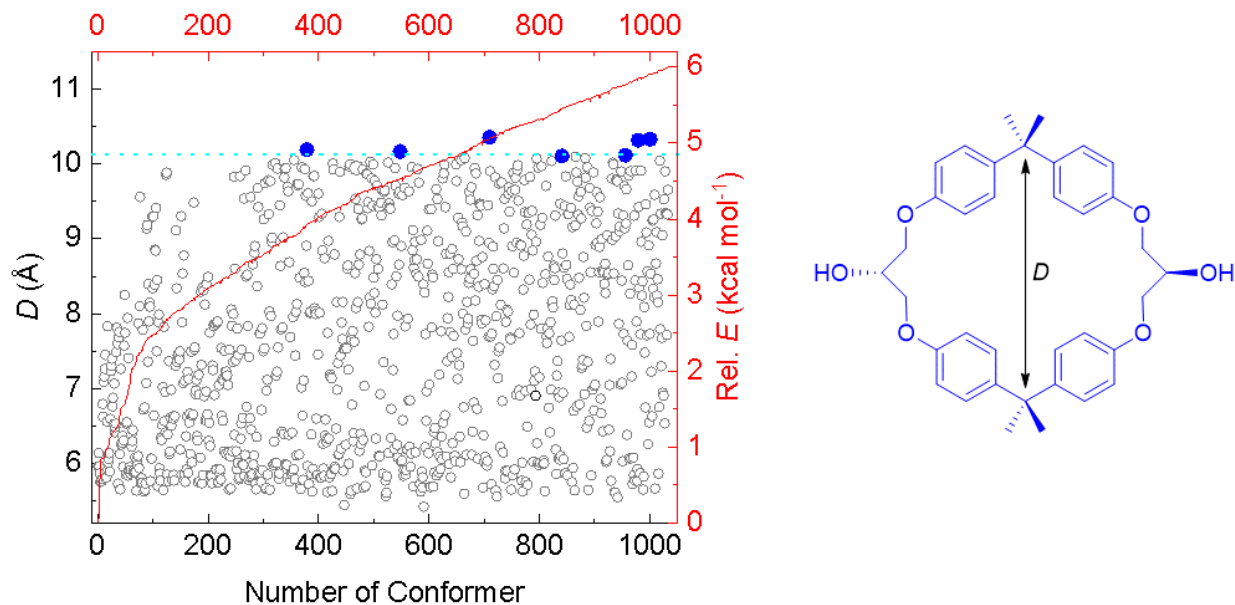

**Fig. S-8** Statistical analysis of the correlations of diagonal distances ( $D$ ) of *trans* cyclo-di-BADGE conformers with their relative energies (rel.  $E$ ) based on CREST calculations.

Following the same CREST method, conformers of the 1:1 complexes of cyclo-di-BADGE and 4,5-pyrenedione were calculated. Fig. S-9 summarizes the  $D$  values of the cyclo-di-BADGE macrocycles in these conformers and their correlations with the rel.  $E$  of the complexes. For the 1:1 complex of *cis* cyclo-di-BADGE and 4,5-pyrenedione, there are 151 conformers predicted.



The  $D$  values of cyclo-di-BADGEs in these conformers range from 5.8 to 8.1 Å (see Fig. 9A). None of them shows an open-shaped cyclo-di-BADGE structure resembling that observed in the X-ray analysis. In contrast, the 1:1 complex of *trans* cyclo-di-BADGE and 4,5-pyrenedione shows 274 conformers (Fig. S-9B), in which three conformers give open-shape cyclo-di-BADGEs ( $D > 10.1$  Å) resembling the X-ray structure of cyclo-di-BADGE.

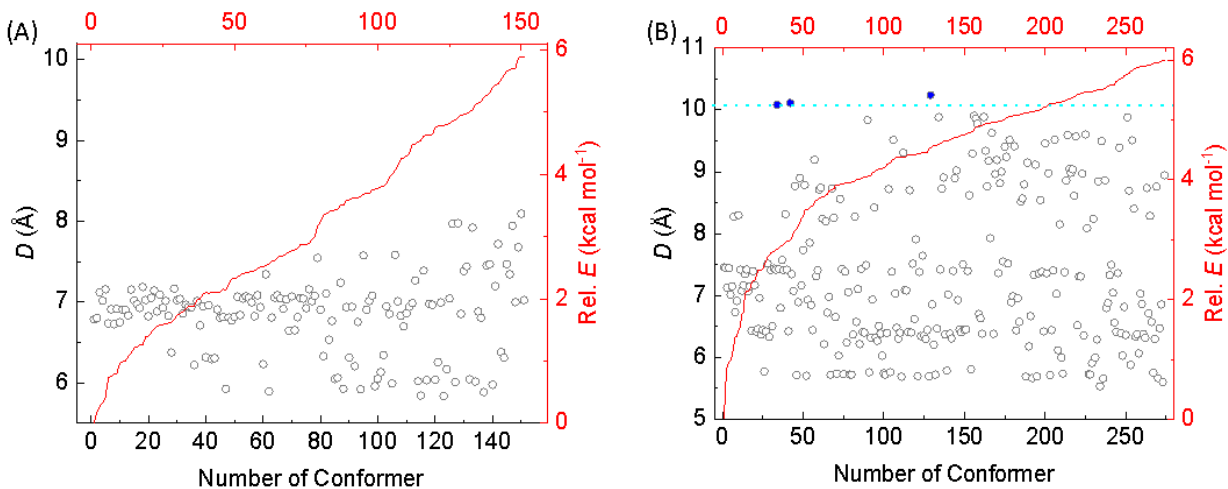

**Fig. S-9** Statistical analysis of the 1:1 complexes of cyclo-di-BADGE and 4,5-pyrenedione based on CREST calculations. (A) Correlations of diagonal distances ( $D$ ) of the *cis* cyclo-di-BADGE moieties with the relative energies (rel.  $E$ ) of the complexes. (B) Correlations of diagonal distances ( $D$ ) of the *trans* cyclo-di-BADGE moieties with the relative energies (rel.  $E$ ) of the complexes.

**Table S-2** Summary of DFT-optimized lowest-energy folded conformers for *cis* cyclo-di-BADGE

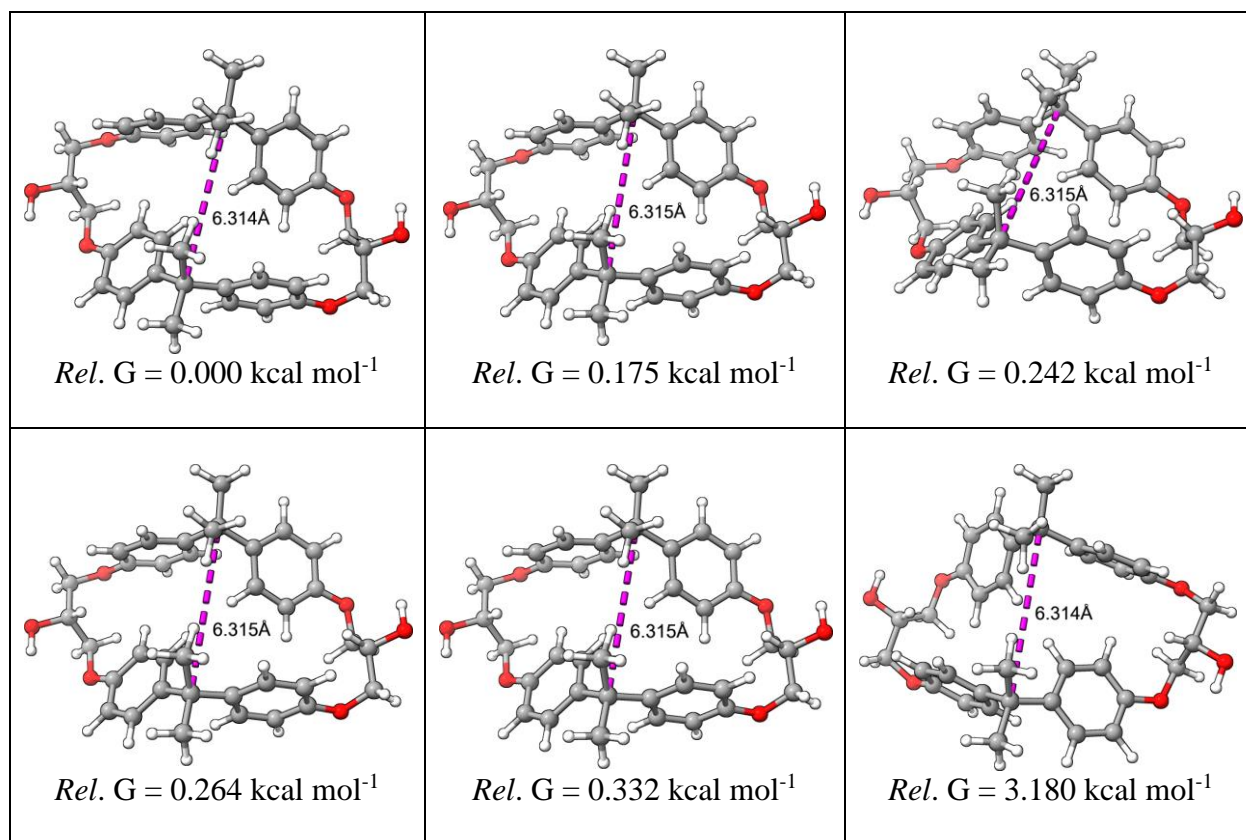

**Table S-3** Summary of DFT-optimized open-shaped conformers for *cis* cyclo-di-BADGE

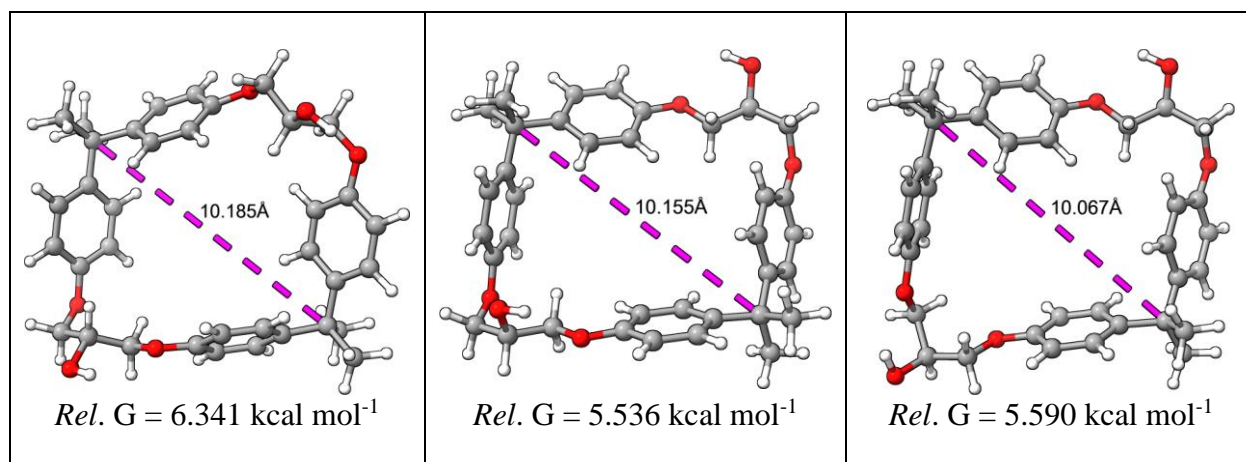

**Table S-4** Summary of DFT-optimized lowest-energy folded conformers for *trans* cyclo-di-BADGE

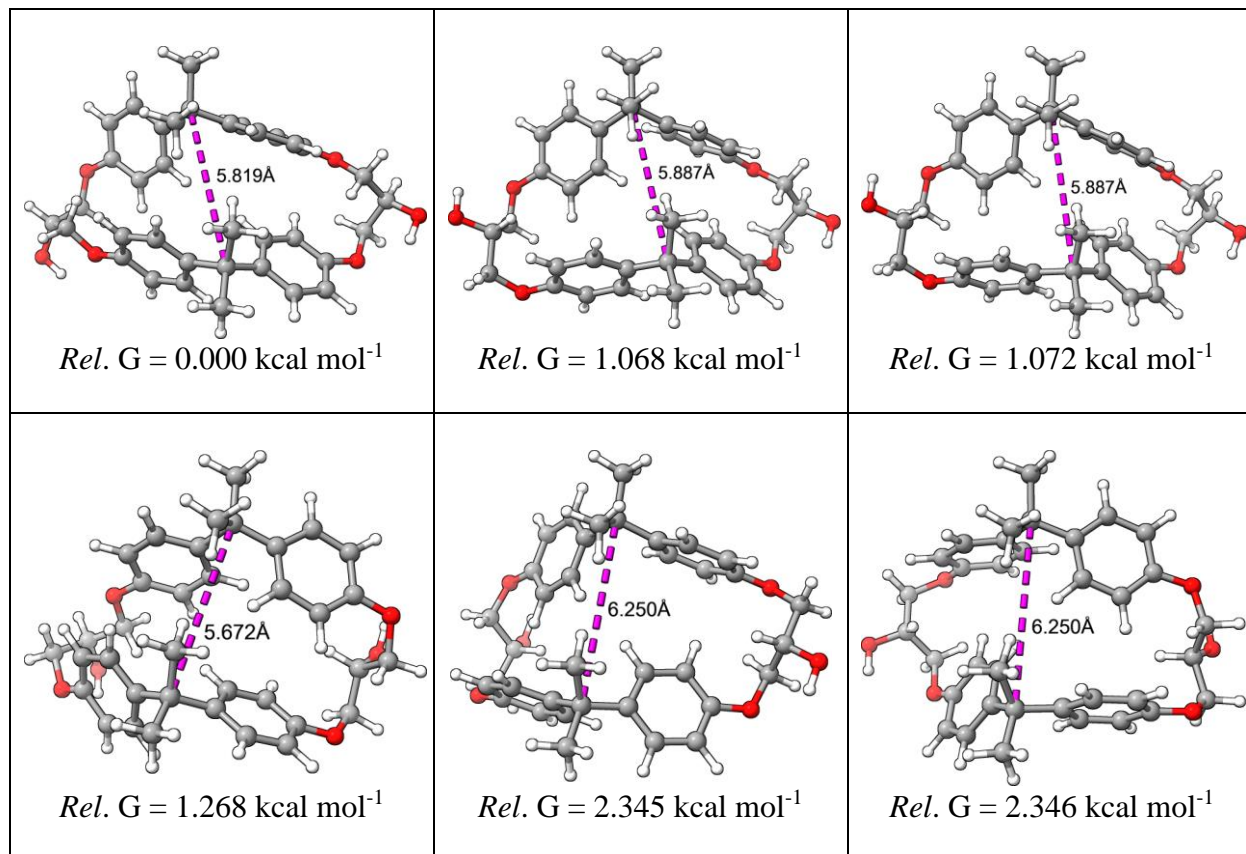

**Table S-5** Summary of DFT-optimized open-shaped conformers for *trans* cyclo-di-BADGE

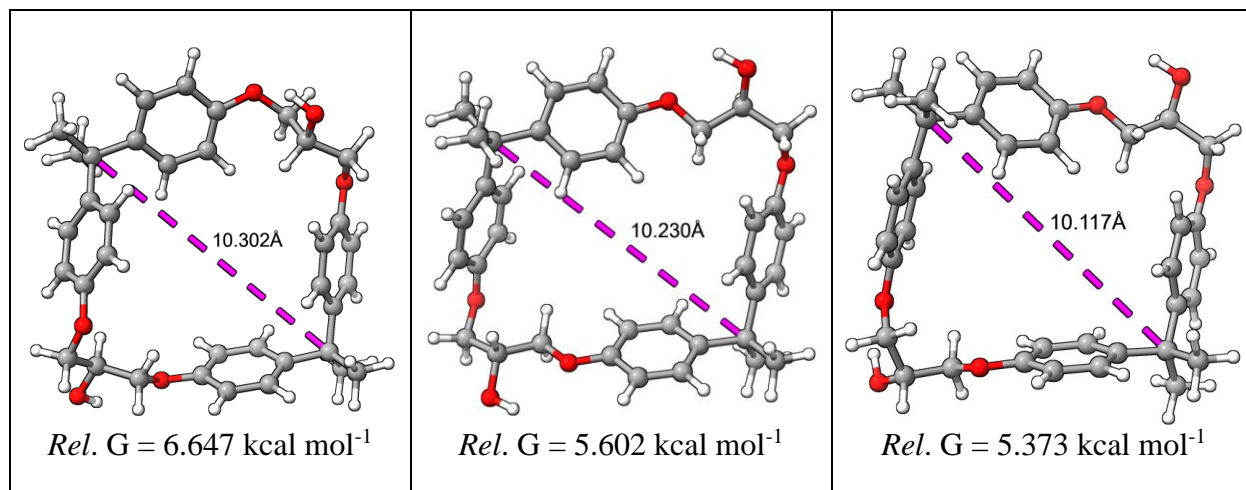

## 5. Results of Molecular Docking Studies

**Table S-6** Docking data for stable complexes of BSA/*cis* cyclo-di-BADGE ( $E_b > 9.0$  kcal mol<sup>-1</sup>)

| Entry | $E_b$<br>(kcal mol <sup>-1</sup> ) | $K_{diss}$<br>(10 <sup>-6</sup> M) | Con. Surf.<br>(Å <sup>2</sup> ) | Contacting Receptor<br>Residues                                                                                                        |
|-------|------------------------------------|------------------------------------|---------------------------------|----------------------------------------------------------------------------------------------------------------------------------------|
| 1     | 9.514                              | 0.106                              | 317.57                          | ARG194, GLN220, LYS221, VAL292, GLU93, LYS294, PRO338, GLU339, LYS439, SER442, GLU443, PRO446, CYS447, ASP450, TYR451                  |
| 2     | 9.438                              | 0.121                              | 342.85                          | ARG217, GLN220, LYS221, GLU291, VAL292, GLU293, LYS294, PRO338, GLU339, TYR340, ALA341, VAL342, LYS439, GLU443, PRO446, CYS447, ASP450 |
| 3     | 9.433                              | 0.122                              | 343.89                          | ARG217, GLN220, LYS221, GLU291, VAL292, GLU293, LYS294, PRO338, GLU339, TYR340, ALA341, VAL342, LYS439, GLU443, PRO446, CYS447, ASP450 |
| 4     | 9.432                              | 0.122                              | 306.75                          | GLU16, GLU17, HIS18, LYS131, TRP134, ASN158, LYS159, ASN161, GLY162, GLN165, PRO281, LEU282, LEU283, GLU284                            |
| 5     | 9.187                              | 0.184                              | 323.19                          | LEU103, SER104, HIS105, LYS106, ASP107, ASP108, SER109, TYR147, ARG196, GLN203, LYS204, VAL461, GLU464, LYS465                         |

$E_b$ : binding energy;  $K_{diss}$ : dissociation constant; Con. Surf.: contacting surface area.

**Table S-7** Plots of stable docked complexes of BSA/*cis* cyclo-di-BADGE listed in Table S-6

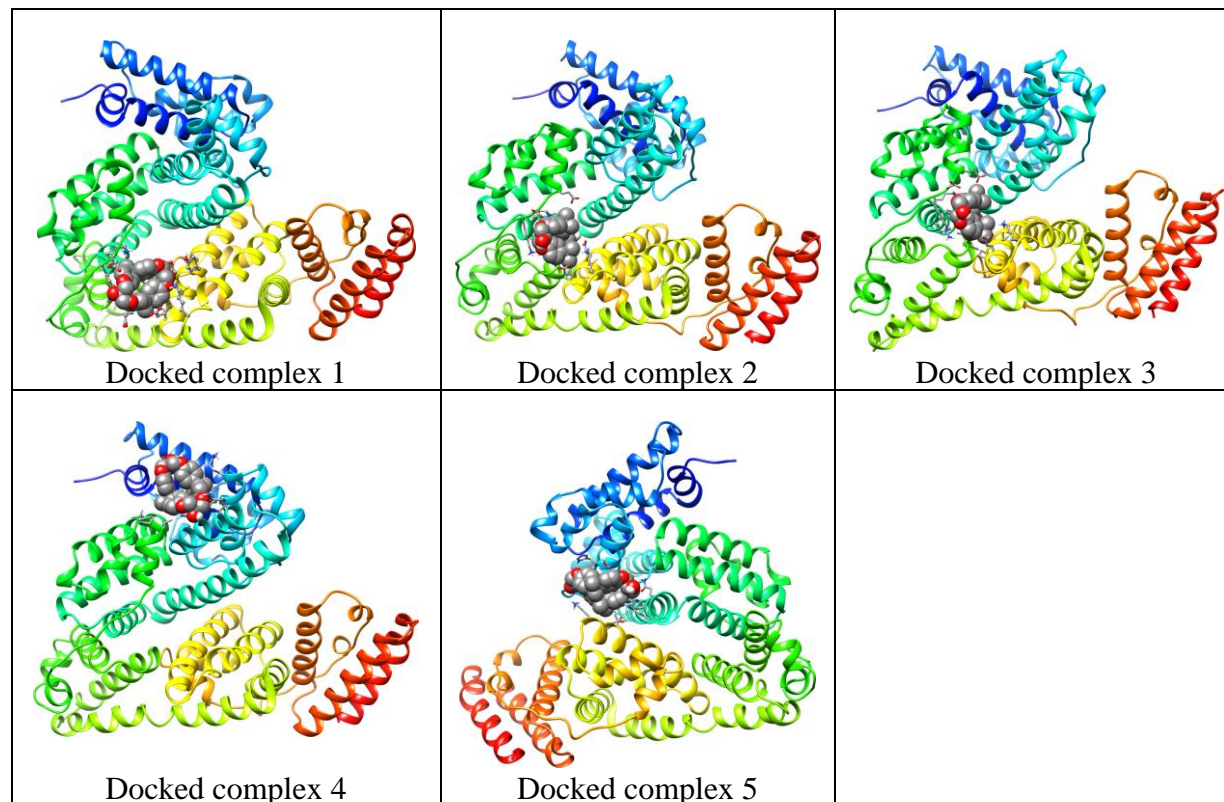



**Table S-8** Docking data for stable complexes of BSA/*trans* cyclo-di-BADGE ( $E_b > 9.0$  kcal mol<sup>-1</sup>)

| Entry | $E_b$<br>(kcal mol <sup>-1</sup> ) | $K_{diss}$<br>(10 <sup>-6</sup> M) | Con. Surf.<br>(Å <sup>2</sup> ) | Contacting Receptor<br>Residues                                                                                                 |
|-------|------------------------------------|------------------------------------|---------------------------------|---------------------------------------------------------------------------------------------------------------------------------|
| 1     | 9.918                              | 0.054                              | 338.46                          | LYS396, LEU397, GLY398, TYR400, GLY401, ASN404, ALA405, VAL408, LYS524, GLU540, LEU543, LYS544, MET547, GLU548, VAL551          |
| 2     | 9.171                              | 0.189                              | 313.72                          | LYS396, LEU397, GLY401, ASN404, ALA405, VAL408, LYS524, GLU540, LEU543, LYS544, MET547, GLU548, VAL551                          |
| 3     | 9.145                              | 0.198                              | 318.45                          | LYS396, LEU397, GLY398, GLU399, TYR400, GLY401, ASN404, ALA405, VAL408, LYS524, GLU540, LEU543, LYS544, MET547, GLU548, VAL 551 |

$E_b$ : binding energy;  $K_{diss}$ : dissociation constant; Con. Surf.: contacting surface area.

**Table S-9** Plots of stable docked complexes of BSA/*trans* cyclo-di-BADGE listed in Table S-8

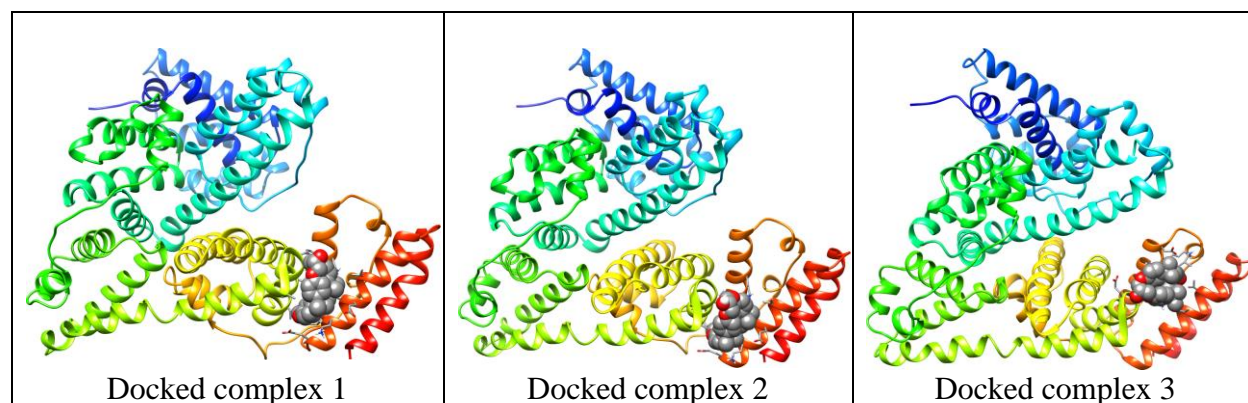

Supplement: d3nj03542e1.pdf [file d3nj03542e1.pdf]
